# Supplementary material for: Molecular Prognostic Factors for Distant Metastases in Premenopausal Patients with HR+/HER2− Early Breast Cancer
Source: MDPI journal article supplement (doi:10.3390/jpm11090835), 2021-08-25
Supplement: s1 [file s1]

**Table S2.** Multivariate analysis of pN, pT, 4 BC360 signatures and 22 DEGs

| Factor           | <i>p</i> -value  | HR    | 95%CI |        |
|------------------|------------------|-------|-------|--------|
|                  |                  |       | lower | higher |
| pN               | <b>0.007</b>     | 2.742 | 1.325 | 5.675  |
| pT               | 0.69             | -     | -     | -      |
| PGR              | 0.20             | -     | -     | -      |
| ROR              | 0.54             | -     | -     | -      |
| Claudin-low      | 0.53             | -     | -     | -      |
| Mammary stemness | 0.36             | -     | -     | -      |
| <i>LRP2</i>      | <b>&lt;0.001</b> | 0.728 | 0.615 | 0.862  |
| <i>SFRP1</i>     | 0.39             | -     | -     | -      |
| <i>CDC14A</i>    | 0.17             | -     | -     | -      |
| <i>OGN</i>       | 0.96             | -     | -     | -      |
| <i>ABCA8</i>     | 0.93             | -     | -     | -      |
| <i>IGF1</i>      | 0.58             | -     | -     | -      |
| <i>BCAS1</i>     | 0.13             | -     | -     | -      |
| <i>IBSP</i>      | <b>0.025</b>     | 1.437 | 1.047 | 1.972  |
| <i>WNT11</i>     | 0.21             | -     | -     | -      |
| <i>IRX1</i>      | 0.57             | -     | -     | -      |
| <i>ERBB4</i>     | 0.80             | -     | -     | -      |
| <i>SOX10</i>     | 0.40             | -     | -     | -      |
| <i>MIA</i>       | 0.14             | -     | -     | -      |
| <i>PGR</i>       | 0.20             | -     | -     | -      |
| <i>HOXA5</i>     | 0.80             | -     | -     | -      |
| <i>STC1</i>      | 0.13             | -     | -     | -      |
| <i>THBS4</i>     | 0.65             | -     | -     | -      |
| <i>PTGER3</i>    | 0.24             | -     | -     | -      |
| <i>SCUBE2</i>    | <b>0.037</b>     | 0.82  | 0.681 | 0.988  |
| <i>SFRP4</i>     | 0.97             | -     | -     | -      |
| <i>HSPA2</i>     | 0.62             | -     | -     | -      |
| <i>ZBTB16</i>    | 0.80             | -     | -     | -      |

DEG: differentially expressed genes, HR: hazard ratio, CI confidence interval

Forward stepwise regression (likelihood ratio) was used. This method selected the most significant independent prognostic factors to be included into the final equation and calculated the HR of the selected factors.
