# Supplementary material for: Molecular Prognostic Factors for Distant Metastases in Premenopausal Patients with HR+/HER2− Early Breast Cancer
Source: MDPI journal article supplement (doi:10.3390/jpm11090835), 2021-08-25
Supplement: s1 [file s1]

## Supplementary Figures

# Molecular Prognostic Factors for Distant Metastases in Premenopausal Patients with HR+/HER2- Early Breast Cancer

Hua Ni <sup>1,¶</sup>, Jörg Kumbrink <sup>2,¶</sup>, Doris Mayr <sup>2</sup>, Alina Seiler <sup>1</sup>, Friederike Hagemann <sup>1</sup>, Tom Degenhardt <sup>1</sup>, Sabine Sagebiel <sup>2</sup>, Rachel Würstlein <sup>1</sup>, Ronald Kates <sup>3</sup>, Nadia Harbeck <sup>1</sup>, and Tanja K Eggersmann <sup>1,4\*</sup>

<sup>1</sup>Breast Center, Department of Gynecology and Obstetrics and Comprehensive Cancer Center (CCC)-Munich, the University Hospital of Ludwig Maximilian University of Munich (LMU), Munich, Germany

<sup>2</sup>Institute of Pathology, Faculty of Medicine, Ludwig Maximilian University of Munich (LMU), Munich, Germany

<sup>3</sup>REK consulting, Otterfing, Germany

<sup>4</sup>Department of Gynecological Endocrinology and Reproductive Medicine, University Hospital of Schleswig-Holstein, Luebeck, Germany

<sup>¶</sup>These authors contributed equally to this work.

\* Correspondence: Tanja.Eggersmann@med.uni-muenchen.de

**Figure S1**

**Figure S2**

**Figure S3**

**Figure S4**

**Figure S1 Ni et al.**

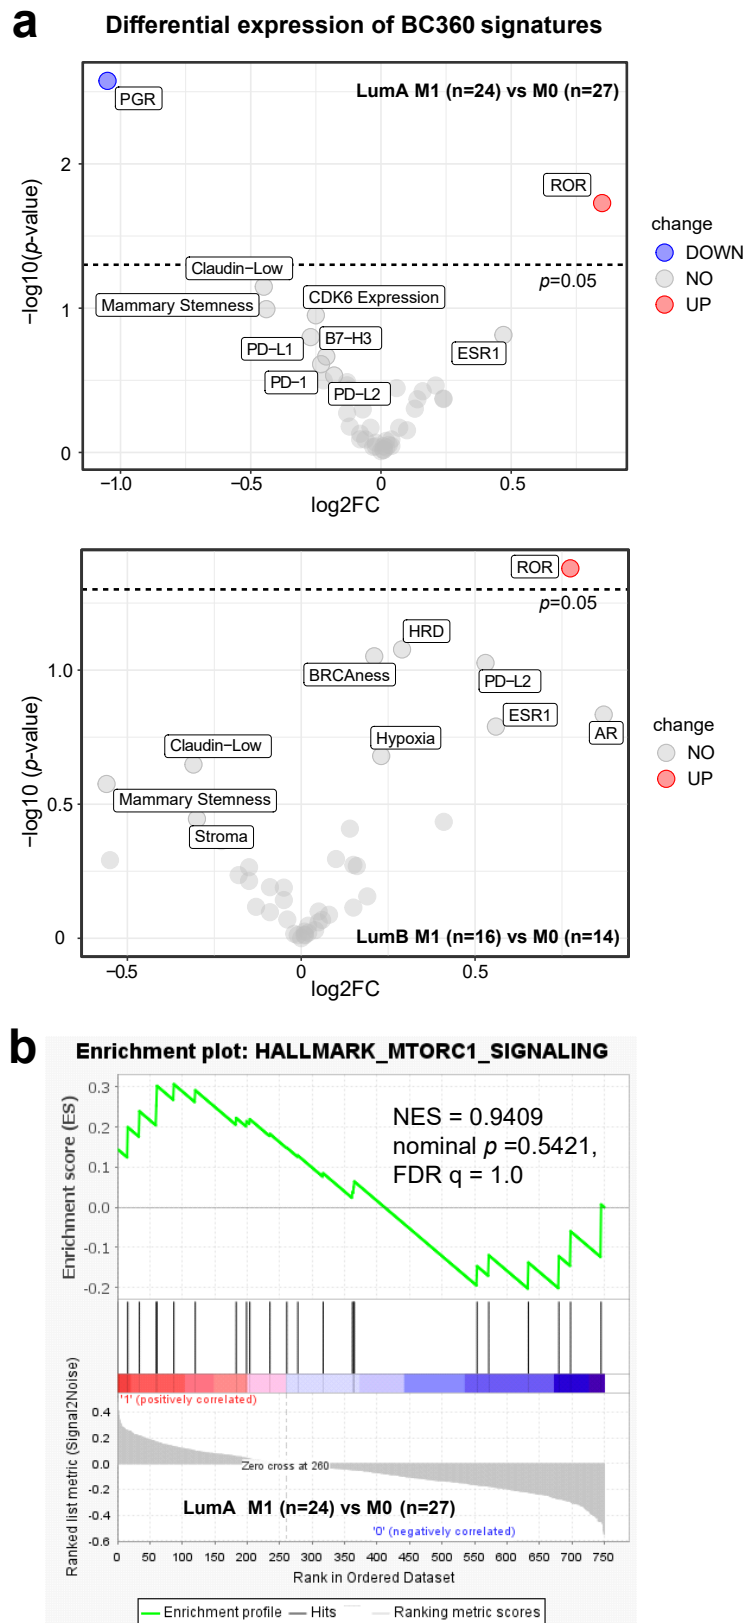

**Figure S1. Differential expression of BC360 signatures in molecular subtypes of breast cancer and GSEA of the Lum A subgroup. (a)** Volcano plots of differentially expressed BC360 signatures in LumA (M0 vs. M1, upper panel) and LumB (M0 vs. M1, lower panel) tumors. Log<sub>2</sub>FC, Log<sub>2</sub> fold change. Cutoffs:  $p$ -value = 0.05. **(b)** Gene set enrichment analysis (GSEA) results of M0 vs. M1 in Luminal A samples. FDR, false discovery rate, NES, normalized enrichment score.



**Figure S3 Ni et al.**

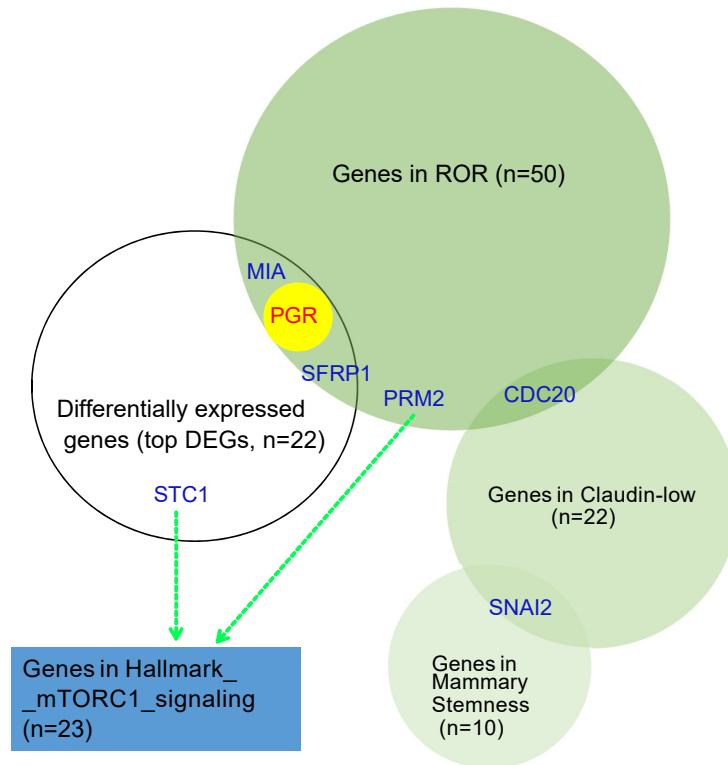

**Figure S3.** Overlap between the 22 DEGs and genes in the differentially expressed signatures. Red gene names, included in three signatures. Blue gene names, present in two signatures.

**Figure S4 Ni et al.**

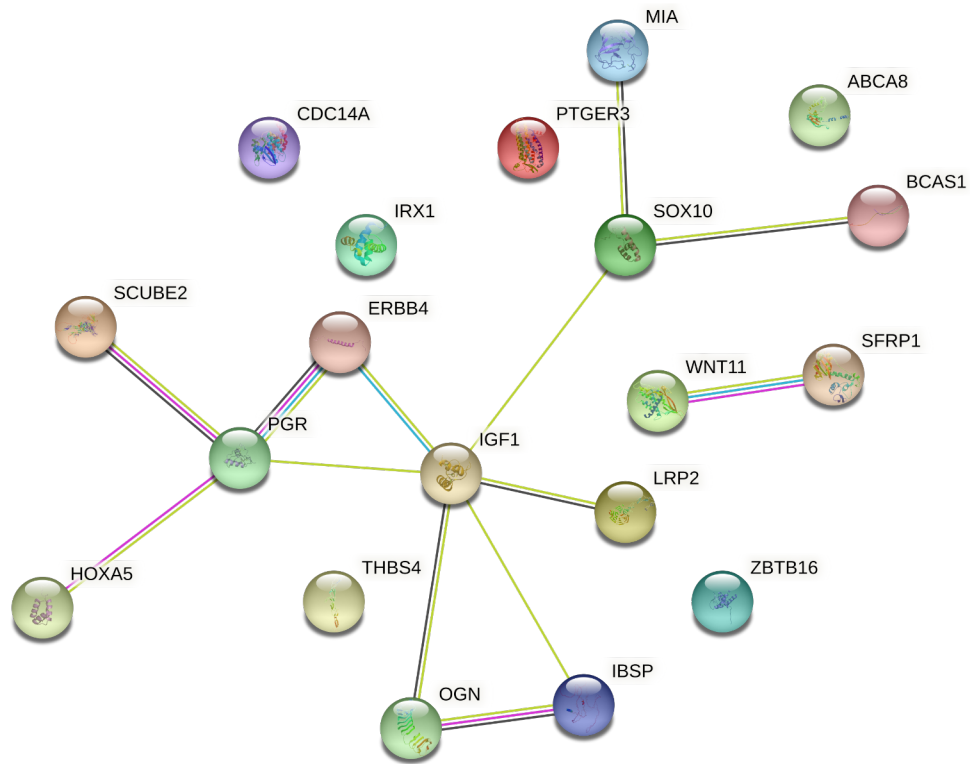

**Figure S4.** Functional interactions of the 19 DEGs that are survival-related.
